# Supplementary material for: Kyropoulos growth and characterization of monoclinic α-Bi2B8O15 single crystal with a noncentrosymmetric structure
Source: Royal Society of Chemistry journal article supplement (doi:10.1039/d1ce01278a), 2021-11-24
Supplement: d1ce01278a1.pdf [file d1ce01278a1.pdf]

## Supporting Information

### Kyropoulos Growth and Characterization of Monoclinic $\alpha$ -Bi<sub>2</sub>B<sub>8</sub>O<sub>15</sub> Single Crystal with Noncentrosymmetric Structure

Mengdi Fan,<sup>a</sup> Guangda Wu,<sup>a</sup> Xinle Wang,<sup>b</sup> Fapeng Yu,<sup>\*,a</sup> Chun Wang,<sup>a</sup> and Xian Zhao<sup>\*,a</sup>

<sup>a</sup>Key Laboratory of Laser & Infrared System, Ministry of Education, State Key Laboratory of Crystal Materials, Shandong University, Qingdao, 266237, China

<sup>b</sup>Department of Physics and Electronic Science, Weifang University, Weifang, 261061, China

Corresponding authors: fapengyu@sdu.edu.cn (F. Yu); xianzhao@sdu.edu.cn (X. Zhao)

**Table S1** Crystallographic data for  $\alpha$ -Bi<sub>2</sub>B<sub>8</sub>O<sub>15</sub> crystal.

**Table S2** Selected bond distances (Å) for  $\alpha$ -Bi<sub>2</sub>B<sub>8</sub>O<sub>15</sub> crystal.

**Table S3** Atomic coordinates for  $\alpha$ -Bi<sub>2</sub>B<sub>8</sub>O<sub>15</sub> crystal.

**Table S4** Valence bonds calculation of  $\alpha$ -Bi<sub>2</sub>B<sub>8</sub>O<sub>15</sub> crystal.

**Fig. S1** Coordination of Bi and B atoms with O in  $\alpha$ -Bi<sub>2</sub>B<sub>8</sub>O<sub>15</sub> crystal.

**Fig. S2** The directions of dipole moments for  $\alpha$ -Bi<sub>2</sub>B<sub>8</sub>O<sub>15</sub> crystal.

**Table S1** Crystallographic data for  $\alpha$ -Bi<sub>2</sub>B<sub>8</sub>O<sub>15</sub> crystal.

---

|                                                            |                                                          |
|------------------------------------------------------------|----------------------------------------------------------|
| Phase Name                                                 | $\alpha$ -Bi <sub>2</sub> B <sub>8</sub> O <sub>15</sub> |
| R-Bragg                                                    | 2.285                                                    |
| Space Group                                                | <i>P</i> 2 <sub>1</sub>                                  |
| Scale                                                      | 8.306×10 <sup>-5</sup>                                   |
| Cell Mass                                                  | 1488.880                                                 |
| Cell Volume (Å <sup>3</sup> )                              | 595.600                                                  |
| Wt%-Rietveld                                               | 100.000                                                  |
| Double-Voigt Approach                                      |                                                          |
| Crystal Size Lorentzian                                    | 63.500                                                   |
| k:1 L Vol-IB (nm)                                          | 40.411                                                   |
| k:0.89 L Vol-FWHM (nm)                                     | 56.496                                                   |
| Crystal Linear Absorption Coefficient. (cm <sup>-1</sup> ) | 562.114                                                  |
| Crystal Density (g/cm <sup>3</sup> )                       | 4.151                                                    |
| Lattice Parameters                                         |                                                          |
| <i>a</i> (Å)                                               | 4.314                                                    |
| <i>b</i> (Å)                                               | 22.158                                                   |
| <i>c</i> (Å)                                               | 6.463                                                    |
| $\beta$ (°)                                                | 105.407                                                  |
| $\alpha=\gamma$ (°)                                        | 90                                                       |

---

**Table S2** Selected bond distances (Å) for  $\alpha$ -Bi<sub>2</sub>B<sub>8</sub>O<sub>15</sub> crystal.

| Atoms | Symmetry        | Distance(Å) | Atoms | Symmetry    | Distance(Å) |
|-------|-----------------|-------------|-------|-------------|-------------|
| Bi1   | x, y, z         | -           | O3    | x, y, z     | 1.3516      |
| O6    | x, y, z         | 2.2562      | O4    | x, y, z     | 1.3413      |
| O4    | x, y, z         | 2.7212      | B4    | x, y, z     | -           |
| O7    | x, y, z         | 2.0917      | O4    | x, y, z     | 1.5377      |
| O8    | x, y, z         | 2.5219      | O5    | x, y, z     | 1.4220      |
| O7    | 1+x, y, z       | 2.6964      | O6    | x, y, z     | 1.4877      |
| O11   | x, y, z         | 2.1506      | O8    | x, y, z-1   | 1.4491      |
| Bi2   | x, y, z         | -           | B5    | x, y, z     | -           |
| O9    | x, y, z         | 2.4904      | O5    | x, y, z     | 1.3581      |
| O10   | 1+x, y, z       | 2.7016      | O7    | x, y, z-1   | 1.3722      |
| O6    | x, y, z         | 2.1182      | O8    | 1+x, y, z-1 | 1.3982      |
| O11   | x, y, z         | 2.2933      | B6    | x, y, z     | -           |
| O13   | x, y, z         | 2.8668      | O9    | x, y, 1+z   | 1.4702      |
| O10   | x, y, z         | 2.0843      | O11   | x, y, z     | 1.4455      |
| B1    | x, y, z         | -           | O12   | x, y, z     | 1.4674      |
| O1    | x, y, z         | 1.4116      | O13   | x, y, z     | 1.4968      |
| O2    | x, y, z         | 1.3368      | B7    | x, y, z     | -           |
| O14   | 1-x, 1/2+y, 2-z | 1.3294      | O9    | x-1, y, 1+z | 1.3522      |
| B2    | x, y, z         | -           | O10   | x, y, 1+z   | 1.3552      |
| O1    | x, y, z         | 1.3908      | O12   | x, y, z     | 1.3746      |
| O3    | x, y, z         | 1.4462      | B8    | x, y, z     | -           |
| O15   | 1-x, 1/2+y, 1-z | 1.2441      | O13   | x, y, z     | 1.3274      |
| B3    | x, y, z         | -           | O14   | x, y, z     | 1.3751      |
| O2    | x, y, z         | 1.3978      | O15   | x, y, z     | 1.4038      |

**Table S3** Atomic coordinates for  $\alpha$ -Bi<sub>2</sub>B<sub>8</sub>O<sub>15</sub> crystal.

| Atoms | Site | <i>x/a</i> | <i>y/b</i> | <i>z/c</i> | Occupied |
|-------|------|------------|------------|------------|----------|
| Bi1   | 2a   | 0.61092    | 0.78383    | 0.89404    | 1        |
| Bi2   | 2a   | 0.82447    | 0.64754    | 0.66890    | 1        |
| B1    | 2a   | 0.44200    | 0.98890    | 0.57100    | 1        |
| B2    | 2a   | 0.46200    | 0.96440    | 0.20800    | 1        |
| B3    | 2a   | 0.69300    | 0.89820    | 0.51100    | 1        |
| B4    | 2a   | 0.86700    | 0.78630    | 0.48000    | 1        |
| B5    | 2a   | 1.28000    | 0.78470    | 0.26500    | 1        |
| B6    | 2a   | 0.57300    | 0.64470    | 1.08600    | 1        |
| B7    | 2a   | 0.14700    | 0.64750    | 1.30400    | 1        |
| B8    | 2a   | 0.60900    | 0.53210    | 1.08900    | 1        |
| O1    | 2a   | 0.35700    | 1.00160    | 0.34900    | 1        |
| O2    | 2a   | 0.60200    | 0.93870    | 0.65000    | 1        |
| O3    | 2a   | 0.63200    | 0.91030    | 0.29900    | 1        |
| O4    | 2a   | 0.82100    | 0.84540    | 0.59300    | 1        |
| O5    | 2a   | 1.18000    | 0.78420    | 0.44730    | 1        |
| O6    | 2a   | 0.83600    | 0.74290    | 0.64900    | 1        |
| O7    | 2a   | 1.09800    | 0.79110    | 1.05700    | 1        |
| O8    | 2a   | 0.61000    | 0.78130    | 1.28400    | 1        |
| O9    | 2a   | 0.82900    | 0.65400    | 0.28500    | 1        |
| O10   | 2a   | 0.33900    | 0.64100    | 0.50600    | 1        |
| O11   | 2a   | 0.59500    | 0.68720    | 0.92080    | 1        |
| O12   | 2a   | 0.25100    | 0.64880    | 1.12060    | 1        |
| O13   | 2a   | 0.59700    | 0.58440    | 0.98700    | 1        |
| O14   | 2a   | 0.64700    | 0.53020    | 1.30700    | 1        |
| O15   | 2a   | 0.58000    | 0.47580    | 0.98600    | 1        |

**Table S4** Valence bonds calculation of  $\alpha$ -Bi<sub>2</sub>B<sub>8</sub>O<sub>15</sub> crystal.

| Bi(1)O <sub>6</sub> octahedron |       | Bi(2)O <sub>6</sub> octahedron |       | BO <sub>3</sub> triangle |       |       |
|--------------------------------|-------|--------------------------------|-------|--------------------------|-------|-------|
| $v_{ij}$                       |       | $v_{ij}$                       |       | $v_{ij}$                 | $V_i$ |       |
| Bi(1)-O6                       | 1.092 | Bi(2)-O4                       | 0.157 | B(1)-O2                  | 1.052 |       |
| Bi(1)-O13                      | 0.115 | Bi(2)-O11                      | 0.990 | B(1)-O14                 | 1.050 | 3.142 |
| Bi(1)-O9                       | 0.326 | Bi(2)-O6                       | 0.500 | B(1)-O1                  | 1.041 |       |
| Bi(1)-O11                      | 0.544 | Bi(2)-O8                       | 0.290 | B(2)-O15                 | 1.055 |       |
| Bi(1)-O10                      | 1.082 | Bi(2)-O7                       | 0.150 | B(2)-O1                  | 1.052 | 3.155 |
| Bi(1)-O10                      | 0.158 | Bi(2)-O7                       | 1.083 | B(2)-O3                  | 1.048 |       |
| $V_i$                          | 3.317 | $V_i$                          | 3.170 |                          |       |       |
| BO <sub>x</sub> polyhedron     |       | BO <sub>x</sub> polyhedron     |       | BO <sub>3</sub> triangle |       |       |
| $v_{ij}$                       | $V_i$ | $v_{ij}$                       | $V_i$ | $v_{ij}$                 | $V_i$ |       |
| B(3)-O4                        | 1.056 | B(5)-O5                        | 0.991 | B(7)-O10                 | 1.050 |       |
| B(3)-O3                        | 1.037 | B(5)-O7                        | 0.984 | B(7)-O9                  | 1.042 | 3.125 |
| B(3)-O2                        | 1.035 | B(5)-O8                        | 0.971 | B(7)-O12                 | 1.034 |       |
| B(4)-O4                        | 0.771 | B(6)-O9                        | 0.748 | B(8)-O13                 | 1.082 |       |
| B(4)-O6                        | 0.780 | B(6)-O12                       | 0.742 | B(8)-O14                 | 1.076 | 3.225 |
| B(4)-O5                        | 0.778 | B(6)-O11                       | 0.747 | B(8)-O15                 | 1.068 |       |
| B(4)-O8                        | 0.783 | B(6)-O13                       | 0.744 |                          |       |       |

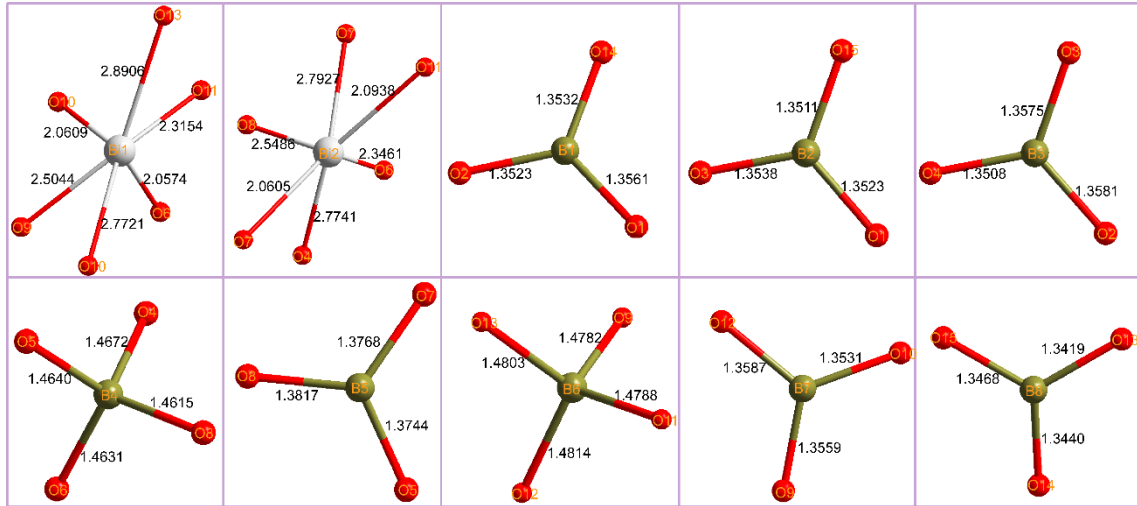

Fig. S1 Coordination of Bi and B atoms with O in  $\alpha$ - $\text{Bi}_2\text{B}_8\text{O}_{15}$  crystal.

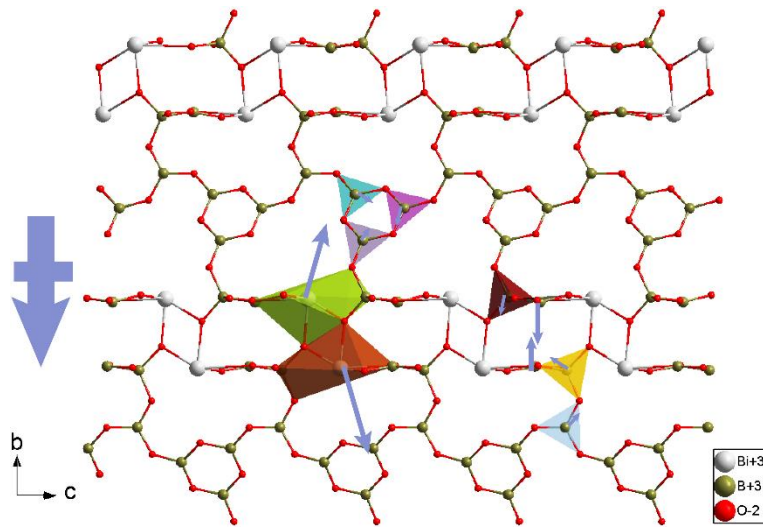

Fig. S2 The directions of dipole moments for  $\alpha$ - $\text{Bi}_2\text{B}_8\text{O}_{15}$  crystal.
